# Supplementary material for: Confidence, prediction, and tolerance in linear mixed models
Source: PubMed Central journal article supplement (PMC6916346; doi:10.1002/sim.8386), 2019-10-28
Supplement: SIM-38-5603-s001.pdf [file SIM-38-5603-s001.pdf]

# Confidence, Prediction and Tolerance in Linear Mixed Models

Bernard G. Francq<sup>1</sup>, Dan Lin, Walter Hoyer

## Supplementary Information

This document provides additional figures, R and SAS code, and details to the manuscript.

### Additional figures to Section 4 - (Average) Widths of the confidence, prediction and tolerance interval

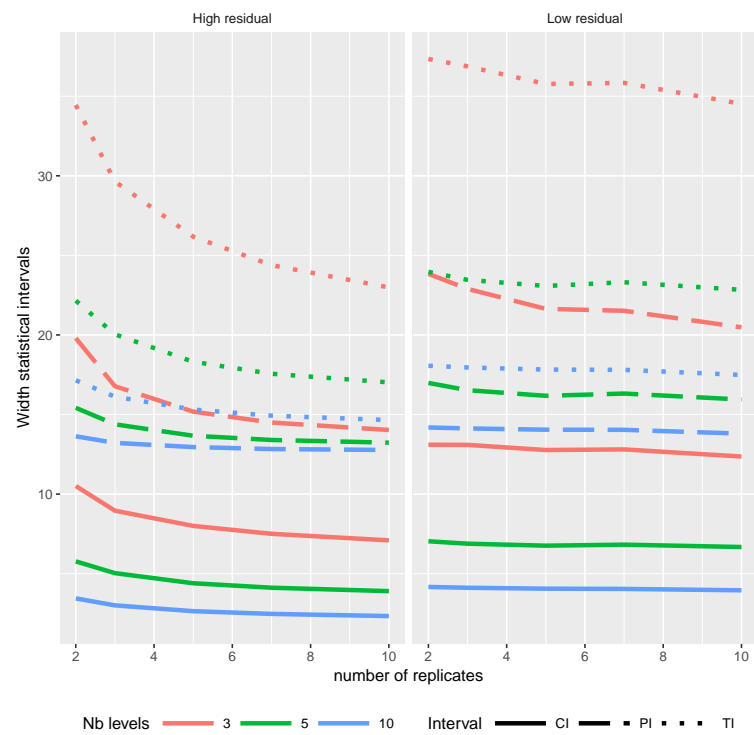

Figure S.1: Widths of the Confidence, Prediction and Tolerance Intervals in one random variable model, according to different sample sizes.

<sup>1</sup>bernard.x.francq@gsk.com, bernard.g.francq@uclouvain.be

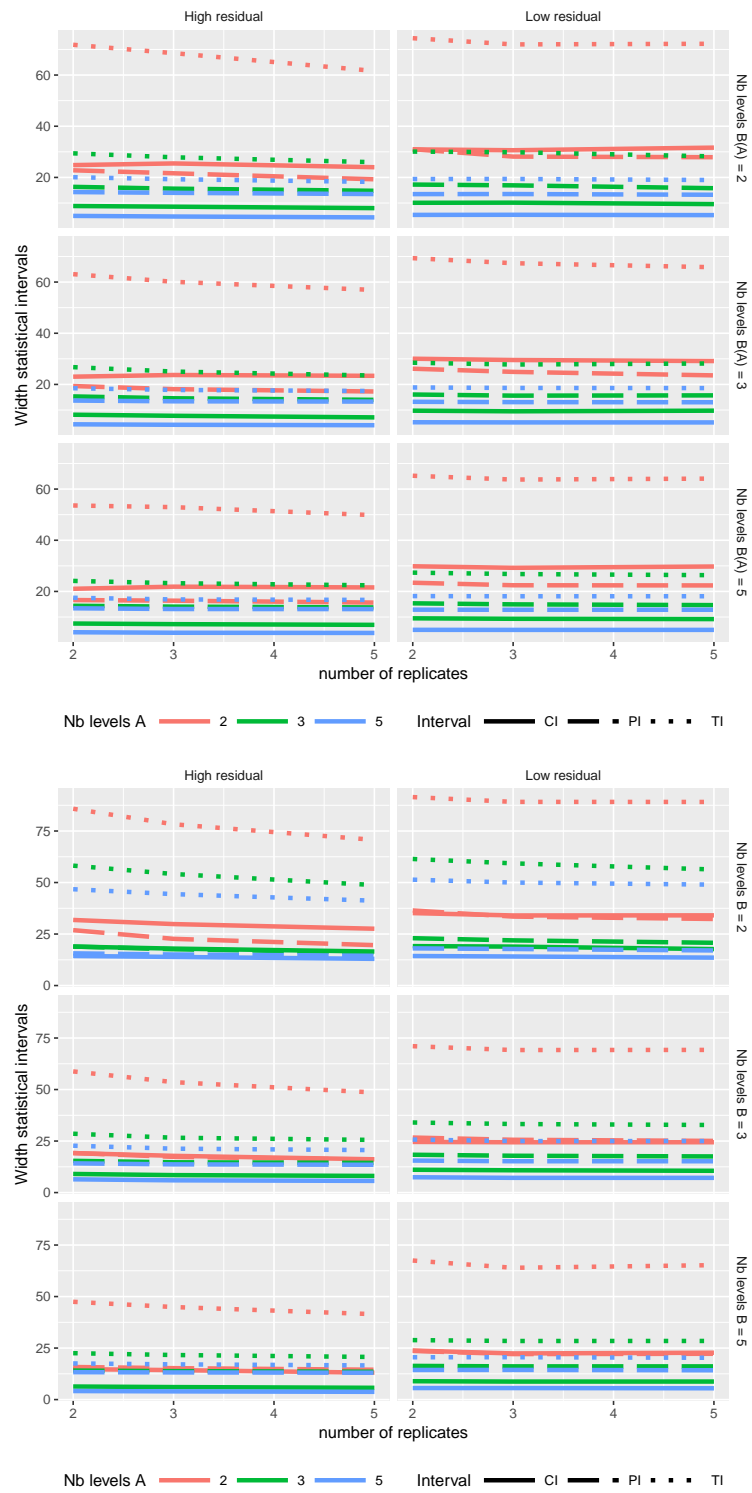

Figure S.2: Widths of the Confidence, Prediction and Tolerance Intervals in two nested (top) or two crossed (bottom) random variables model, according to different sample sizes.

# Additional material to Section 4.4 - A paradox with confidence interval larger than prediction interval

Two nested random variables

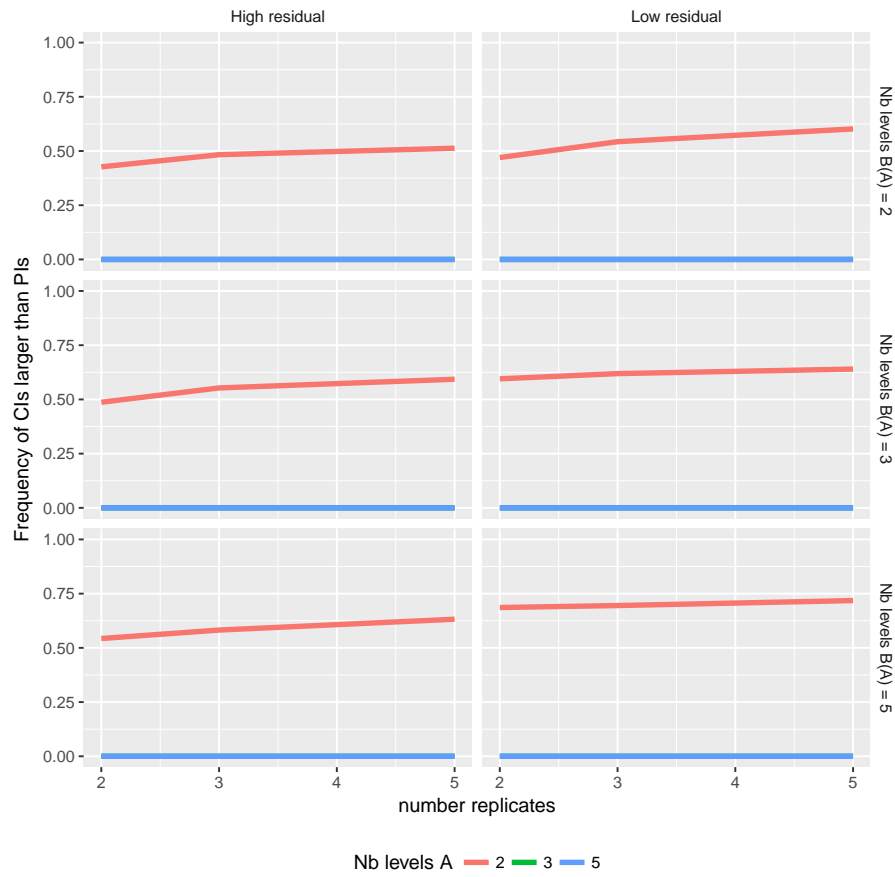

Figure S.3: Frequency of Confidence Intervals larger than Prediction Intervals in two nested random variables model, according to different sample sizes.

## Two crossed random variables

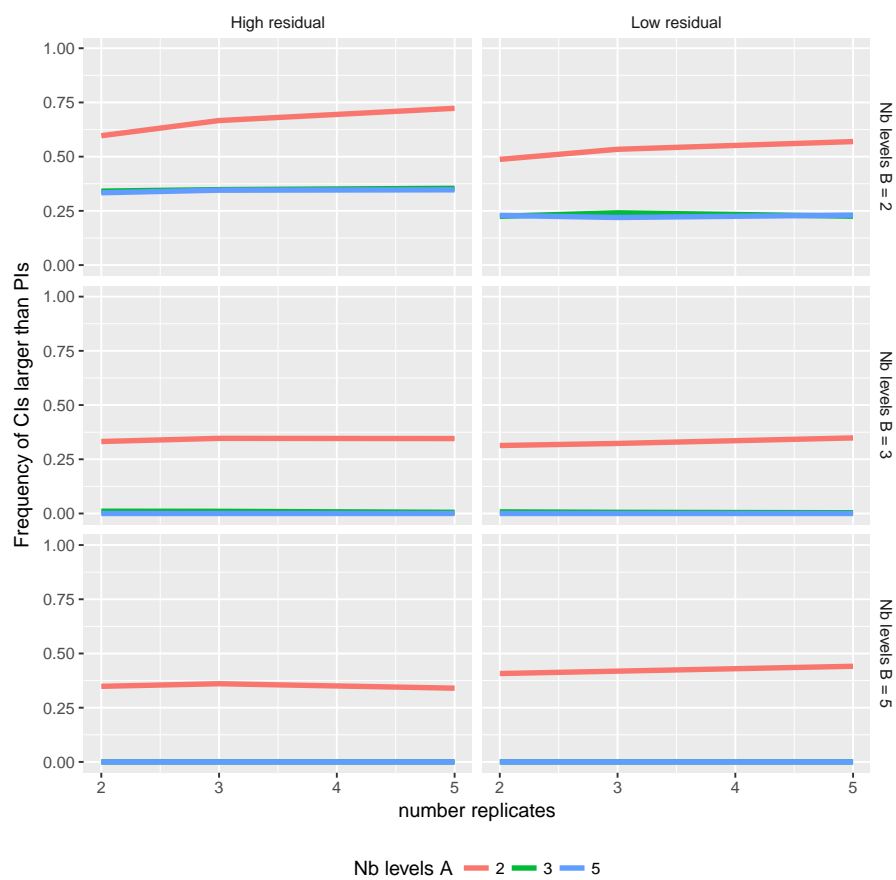

Figure S.4: Frequency of Confidence Intervals larger than Prediction Intervals in two crossed random variables model, according to different sample sizes.

# Orthopedic Surgery Study, Intralesional Resection Risk - Section 5.1

## Orthopedic Surgery Study, Intralesional Resection Risk - Data

Table 1: Error on Safe Margin (ESM) data with 23 Surgeons (S) (10 senior (T = 1) and 13 junior (T = 2)), 2 Procedures (1 = free hand, 2 = navigated), 4 Slices (Sl)

| S | T | P | Sl | ESM          | S  | T | P | Sl | ESM          |
|---|---|---|----|--------------|----|---|---|----|--------------|
| 1 | 1 | 1 | 1  | -0.199433025 | 12 | 2 | 2 | 1  | 3.645450552  |
| 1 | 1 | 1 | 2  | -3.257110126 | 12 | 2 | 2 | 2  | 2.653294657  |
| 1 | 1 | 1 | 3  | -6.097795531 | 12 | 2 | 2 | 3  | 1.176665963  |
| 1 | 1 | 1 | 4  | -1.801171635 | 12 | 2 | 2 | 4  | -0.556436938 |
| 1 | 1 | 2 | 1  | 2.47920259   | 13 | 2 | 1 | 1  | 6.995088621  |
| 1 | 1 | 2 | 2  | 0.556467843  | 13 | 2 | 1 | 2  | 4.50804089   |
| 1 | 1 | 2 | 3  | -4.200284644 | 13 | 2 | 1 | 3  | 1.706578724  |
| 1 | 1 | 2 | 4  | -0.503255249 | 13 | 2 | 1 | 4  | -6.948706763 |
| 2 | 1 | 1 | 1  | 0.579324004  | 13 | 2 | 2 | 1  | 1.655868771  |
| 2 | 1 | 1 | 2  | 1.795684047  | 13 | 2 | 2 | 2  | 4.001138681  |
| 2 | 1 | 1 | 3  | -7.84372224  | 13 | 2 | 2 | 3  | 1.859375282  |
| 2 | 1 | 1 | 4  | -10.06203038 | 13 | 2 | 2 | 4  | 1.177417998  |
| 2 | 1 | 2 | 1  | -2.12002035  | 14 | 2 | 1 | 1  | -0.303659036 |
| 2 | 1 | 2 | 2  | 1.961510909  | 14 | 2 | 1 | 2  | 0.032991042  |
| 2 | 1 | 2 | 3  | 2.053270279  | 14 | 2 | 1 | 3  | -8.837578381 |
| 2 | 1 | 2 | 4  | 4.28509354   | 14 | 2 | 1 | 4  | 5.272748506  |
| 3 | 1 | 1 | 1  | 0.594384847  | 14 | 2 | 2 | 1  | 0.332346267  |
| 3 | 1 | 1 | 2  | 13.08583217  | 14 | 2 | 2 | 2  | 0.028241458  |
| 3 | 1 | 1 | 3  | -7.755593652 | 14 | 2 | 2 | 3  | -1.28059761  |
| 3 | 1 | 1 | 4  | -7.652534463 | 14 | 2 | 2 | 4  | -1.091097724 |
| 3 | 1 | 2 | 1  | 2.186481394  | 15 | 2 | 1 | 1  | -8.00357811  |
| 3 | 1 | 2 | 2  | -0.253338241 | 15 | 2 | 1 | 2  | -1.398753195 |
| 3 | 1 | 2 | 3  | -2.68651742  | 15 | 2 | 1 | 3  | -3.388708179 |
| 3 | 1 | 2 | 4  | 1.222242781  | 15 | 2 | 1 | 4  | -10.4677522  |
| 4 | 1 | 1 | 1  | 7.008679635  | 15 | 2 | 2 | 1  | -0.850897936 |
| 4 | 1 | 1 | 2  | 9.396533372  | 15 | 2 | 2 | 2  | 0.249953261  |
| 4 | 1 | 1 | 3  | -2.119601508 | 15 | 2 | 2 | 3  | -0.359438631 |
| 4 | 1 | 1 | 4  | -3.948526636 | 15 | 2 | 2 | 4  | 0.276717839  |
| 4 | 1 | 2 | 1  | 1.969926726  | 16 | 2 | 1 | 1  | -1.190984659 |
| 4 | 1 | 2 | 2  | 1.345195294  | 16 | 2 | 1 | 2  | 0.985835269  |
| 4 | 1 | 2 | 3  | -0.845207026 | 16 | 2 | 1 | 3  | -2.829419859 |
| 4 | 1 | 2 | 4  | -2.315714263 | 16 | 2 | 1 | 4  | -3.17059446  |
| 5 | 1 | 1 | 1  | 9.469642722  | 16 | 2 | 2 | 1  | 0.545197278  |
| 5 | 1 | 1 | 2  | 2.550111058  | 16 | 2 | 2 | 2  | 3.393442227  |
| 5 | 1 | 1 | 3  | 4.732536916  | 16 | 2 | 2 | 3  | -0.475404056 |
| 5 | 1 | 1 | 4  | 5.394352277  | 16 | 2 | 2 | 4  | 1.048609558  |
| 5 | 1 | 2 | 1  | 0.666808812  | 17 | 2 | 1 | 1  | 2.939809264  |
| 5 | 1 | 2 | 2  | 4.740998052  | 17 | 2 | 1 | 2  | 10.85359371  |
| 5 | 1 | 2 | 3  | -0.672978867 | 17 | 2 | 1 | 3  | -3.722642625 |
| 5 | 1 | 2 | 4  | -0.199835394 | 17 | 2 | 1 | 4  | 0.69149394   |

*Continued on next page*

Table 1 – *Continued from previous page*

| S  | T | P | Sl | ESM          | S  | T | P | Sl | ESM          |
|----|---|---|----|--------------|----|---|---|----|--------------|
| 6  | 1 | 1 | 1  | -6.005567639 | 17 | 2 | 2 | 1  | -0.49561995  |
| 6  | 1 | 1 | 2  | 8.732595809  | 17 | 2 | 2 | 2  | 1.318456583  |
| 6  | 1 | 1 | 3  | -4.998981543 | 17 | 2 | 2 | 3  | -1.363158874 |
| 6  | 1 | 1 | 4  | 5.347002874  | 17 | 2 | 2 | 4  | 1.501276621  |
| 6  | 1 | 2 | 1  | 5.265503882  | 18 | 2 | 1 | 1  | -0.731155605 |
| 6  | 1 | 2 | 2  | 0.90179087   | 18 | 2 | 1 | 2  | 3.035331218  |
| 6  | 1 | 2 | 3  | -0.982043294 | 18 | 2 | 1 | 3  | 10.79346831  |
| 6  | 1 | 2 | 4  | -0.063627675 | 18 | 2 | 1 | 4  | 2.340906825  |
| 7  | 1 | 1 | 1  | 2.178684206  | 18 | 2 | 2 | 1  | 1.080578996  |
| 7  | 1 | 1 | 2  | 6.207547426  | 18 | 2 | 2 | 2  | -4.322238012 |
| 7  | 1 | 1 | 3  | -0.372947673 | 18 | 2 | 2 | 3  | -4.037473506 |
| 7  | 1 | 1 | 4  | -2.515639846 | 18 | 2 | 2 | 4  | 2.821756483  |
| 7  | 1 | 2 | 1  | 1.947725446  | 19 | 2 | 1 | 1  | -7.637179919 |
| 7  | 1 | 2 | 2  | 2.742861691  | 19 | 2 | 1 | 2  | -4.684496483 |
| 7  | 1 | 2 | 3  | -1.10561243  | 19 | 2 | 1 | 3  | -9.61826304  |
| 7  | 1 | 2 | 4  | 1.142331658  | 19 | 2 | 1 | 4  | -10.88681822 |
| 8  | 1 | 1 | 1  | 3.473064383  | 19 | 2 | 2 | 1  | 0.528877263  |
| 8  | 1 | 1 | 2  | 6.834012012  | 19 | 2 | 2 | 2  | 5.000027971  |
| 8  | 1 | 1 | 3  | 0.319412923  | 19 | 2 | 2 | 3  | 5.036821017  |
| 8  | 1 | 1 | 4  | -8.148487852 | 19 | 2 | 2 | 4  | 1.220096839  |
| 8  | 1 | 2 | 1  | -0.573665795 | 20 | 2 | 1 | 1  | -11.05336479 |
| 8  | 1 | 2 | 2  | 0.050016286  | 20 | 2 | 1 | 2  | -0.571742129 |
| 8  | 1 | 2 | 3  | -4.41972017  | 20 | 2 | 1 | 3  | -11.6323534  |
| 8  | 1 | 2 | 4  | -4.60992034  | 20 | 2 | 1 | 4  | -5.553300133 |
| 9  | 1 | 1 | 1  | 3.227905411  | 20 | 2 | 2 | 1  | -1.069254728 |
| 9  | 1 | 1 | 2  | 6.950558186  | 20 | 2 | 2 | 2  | -1.822197379 |
| 9  | 1 | 1 | 3  | -1.751515803 | 20 | 2 | 2 | 3  | -0.796320339 |
| 9  | 1 | 1 | 4  | -2.632273349 | 20 | 2 | 2 | 4  | 1.067784422  |
| 9  | 1 | 2 | 1  | 6.500339875  | 21 | 2 | 1 | 1  | -1.695086081 |
| 9  | 1 | 2 | 2  | 1.446851398  | 21 | 2 | 1 | 2  | 2.676954209  |
| 9  | 1 | 2 | 3  | -2.818420161 | 21 | 2 | 1 | 3  | 0.059231146  |
| 9  | 1 | 2 | 4  | 0.649838638  | 21 | 2 | 1 | 4  | -0.030720039 |
| 10 | 1 | 1 | 1  | -0.785676311 | 21 | 2 | 2 | 1  | 0.534649542  |
| 10 | 1 | 1 | 2  | 0.907771737  | 21 | 2 | 2 | 2  | 0.891207214  |
| 10 | 1 | 1 | 3  | -1.314186537 | 21 | 2 | 2 | 3  | 0.510001948  |
| 10 | 1 | 1 | 4  | -0.822383964 | 21 | 2 | 2 | 4  | -0.578939074 |
| 10 | 1 | 2 | 1  | 1.960098655  | 22 | 2 | 1 | 1  | 1.882796607  |
| 10 | 1 | 2 | 2  | -0.735292122 | 22 | 2 | 1 | 2  | 2.206442557  |
| 10 | 1 | 2 | 3  | -0.192647106 | 22 | 2 | 1 | 3  | 0.165363349  |
| 10 | 1 | 2 | 4  | -0.732942363 | 22 | 2 | 1 | 4  | 8.449809985  |
| 11 | 2 | 1 | 1  | 0.783003671  | 22 | 2 | 2 | 1  | 0.283382291  |
| 11 | 2 | 1 | 2  | 3.551837181  | 22 | 2 | 2 | 2  | 0.710908822  |
| 11 | 2 | 1 | 3  | -4.417912977 | 22 | 2 | 2 | 3  | -1.229336454 |
| 11 | 2 | 1 | 4  | 4.221018801  | 22 | 2 | 2 | 4  | 0.227583336  |
| 11 | 2 | 2 | 1  | 0.380875478  | 23 | 2 | 1 | 1  | -1.565415884 |
| 11 | 2 | 2 | 2  | 3.128745017  | 23 | 2 | 1 | 2  | 1.85562997   |
| 11 | 2 | 2 | 3  | -1.018740063 | 23 | 2 | 1 | 3  | 3.347694472  |
| 11 | 2 | 2 | 4  | -1.762189915 | 23 | 2 | 1 | 4  | 4.237200596  |
| 12 | 2 | 1 | 1  | 2.661981324  | 23 | 2 | 2 | 1  | 2.803884792  |

*Continued on next page*

Table 1 – *Continued from previous page*

| S  | T | P | Sl | ESM          | S  | T | P | Sl | ESM          |
|----|---|---|----|--------------|----|---|---|----|--------------|
| 12 | 2 | 1 | 2  | 4.909653675  | 23 | 2 | 2 | 2  | 1.465135911  |
| 12 | 2 | 1 | 3  | -1.798135049 | 23 | 2 | 2 | 3  | -2.591379572 |
| 12 | 2 | 1 | 4  | -5.352090715 | 23 | 2 | 2 | 4  | 0.171340156  |

## Orthopedic Surgery Study, Intralesional Resection Risk - SAS Code

The data set is in the stacked format and named 'ESM'. The following SAS code is for the 'free hand' procedure (procedure = 1). The same code can be run for the navigated technology (procedure = 2).

```
/* Orthopedic Surgery Study, Intralesional Resection Risk */
/* Bernard G FRANCO */

/* Estimate the Mixed Model */
ODS OUTPUT AsyCov = AsyCov SolutionF = SolutionF CovParms = CovParms ;
PROC MIXED DATA = ESM ASYCOV METHOD=REML;
CLASS decoupe operateur PROCEDURE;
MODEL ESM = decoupe / S CL DDFM = KENWARDROGER NOINT;
RANDOM operateur;
WHERE procedure = 1;
RUN;

/* Check Degrees of freedom and EMS for the tolerance intervals */
PROC GLM DATA = ESM;
CLASS decoupe operateur PROCEDURE;
MODEL ESM = decoupe operateur / NOINT;
RANDOM operateur;
WHERE procedure = 1;
RUN;

/* Calculate the Total Variance */
PROC TRANSPOSE DATA = CovParms OUT = CovParmsbis;
VAR Estimate;
RUN;
DATA CovParmsbis;
SET CovParmsbis;
varsurgeon = COL1;
varres = COL2;
vartot = varsurgeon + varres;
DROP _NAME_ COL1 COL2;
RUN;

/* Variances of variances */
DATA Asycov1 (RENAME = (CovP1 = varvarsurgeon CovP2 = covsurgeonres));
SET Asycov;
WHERE Row = 1;
DROP Row CovParm;
RUN;
DATA Asycov2 (RENAME = (CovP2 = varvarres));
SET Asycov;
WHERE Row = 2;
DROP Row CovParm CovP1;
RUN;
DATA Asycovbis;
SET Asycov1;
SET Asycov2;
```



```

varvartot = varvarsurgeon + varvarres + 2*covsurgeonres;
RUN;
PROC DELETE LIB = WORK DATA = Asycov1 Asycov2;
RUN;

DATA var;
SET CovParmsbis;
SET Asycovbis (KEEP = varvartot);
RUN;

/* merge (Confidence Intervals given by CI1 and CI2) */

DATA Results;
SET Solutionf (DROP = tValue Probt Alpha RENAME = (Lower = CI1 Upper = CI2));
IF _N_=1 THEN SET var;
RUN;

/* Calculate the Prediction and Tolerance Intervals */

DATA Results (DROP = varvartot MSsurgeon tPI ksurgeon kres Hsurgeon Hres all);
SET Results;

varPI = StdErr ** 2 + vartot;
MSsurgeon = varres + 4*varsurgeon;

/* Calculate the degrees of freedom from the total variance */
dfvartot = 2 * (vartot ** 2 / varvartot);

/* Formula (21) - 95% Prediction Interval */
tPI = quantile('T',.975,dfvartot);
PI1 = Estimate - tPI * sqrt(varPI);
PI2 = Estimate + tPI * sqrt(varPI);

/* Formulae (26,27,28) - 95%-80% Tolerance Interval */

ksurgeon = 1/4;
kres = 1-1/4;
Hsurgeon = (23-1)/quantile('CHISQUARE',0.2,23-1) - 1;
Hres = 66/quantile('CHISQUARE',0.2,66) - 1;
all = Hsurgeon**2 * ksurgeon**2 * MSsurgeon**2 + Hres**2 * kres**2 * varres**2;
TI1 = Estimate - quantile('NORMAL', 0.975) * sqrt(varPI) * sqrt(1+1/vartot*sqrt(all));
TI2 = Estimate + quantile('NORMAL', 0.975) * sqrt(varPI) * sqrt(1+1/vartot*sqrt(all));
RUN;

```

## Orthopedic Surgery Study, Intralesional Resection Risk - R Code

```
# Orthopedic Surgery Study, Intralesional Resection Risk
# Estimate Mixed Model and calculate the different statistical intervals
# Bernard G FRANCO

rm(list = ls())

ESM = data.frame(read.table(...))
ESM = ESM[ESM$PROCEDURE == 1,]
ESM$Surgeon = as.factor(ESM$Surgeon)
ESM$SLICE = as.factor(ESM$SLICE)

# Mixed Model

model = varComp(data = ESM, fixed = as.formula("ESM ~SLICE -1"), random = as.formula("~Surgeon"))
summary(model)

# Intercept and its standard error, and 95% Confidence Interval:

res = as.data.frame(attr(unclass(fixef(model)), "anova"))
res = data.frame(Estimate = coef(model), res[, c("Std. Error", "Lower", "Upper", "Df")])

# Variance components and their covariance matrix:

var.surgeon = model$varComp
var.res = model$sigma2
cov.matrix = vcov(model, what = "random")

# Total variance and its variance:

var.tot = var.surgeon + var.res
var.var.tot = sum(cov.matrix)

# Degrees of freedom for prediction

r = 2*var.tot^2/var.var.tot

# 95% Prediction Interval and 95%-80% Tolerance Interval:

res$dfPI = r
res$PI1 = res$Estimate - qt(0.975, r) * sqrt(res$Std..Error^2 + var.tot)
res$PI2 = res$Estimate + qt(0.975, r) * sqrt(res$Std..Error^2 + var.tot)

H.surgeon = 22 / qchisq(0.2, 22) - 1
H.res = 66 / qchisq(0.2, 66) - 1
comp.surgeon = H.surgeon^2 * (1/4)^2 * (4*var.surgeon + var.res)^2
comp.res = H.res^2 * (1-1/4)^2 * var.res^2
term = 1 + 1/var.tot * sqrt(comp.surgeon + comp.res)

res$TI1 = res$Estimate - qnorm(0.975) * sqrt(res$Std..Error^2 + var.tot) * sqrt(term)
res$TI2 = res$Estimate + qnorm(0.975) * sqrt(res$Std..Error^2 + var.tot) * sqrt(term)
```



## Assay Validation Study - SAS Code

```
/* SAS Code - Assay Validation, Data from Hoffman and Kringle (2005) */
/* Bernard G FRANCO */

    data assay;
input run rep conc ;
cards;
1 1 0.969
1 2 0.976
1 3 0.938
2 1 0.952
2 2 0.993
2 3 0.956
3 1 0.989
3 2 0.883
3 3 0.981
4 1 1
4 2 0.969
4 3 0.954
5 1 0.959
5 2 0.989
5 3 1.02
6 1 1.02
6 2 1.09
6 3 1.02
;
run;

    ODS OUTPUT AsyCov = AsyCov SolutionF = SolutionF CovParms = CovParms ;
PROC MIXED DATA = assay ASYCOV METHOD=REML;
CLASS run;
MODEL conc = / S CL DDFM = KENWARDROGER;
RANDOM run ;
RUN;

/* Check Degrees of freedom and EMS for the tolerance intervals */
PROC GLM DATA = assay;
CLASS run;
MODEL conc = run;
RANDOM run ;
RUN;

/* Calculate the Total Variance */
PROC TRANSPOSE DATA = CovParms OUT = CovParmsbis;
VAR Estimate;
RUN;

    DATA CovParmsbis;
SET CovParmsbis;
varrun = COL1;
varres = COL2;
```

```

vartot = varrun + varres;
DROP _NAME_ COL1 COL2;
RUN;

/* Variances of variances */
DATA Asycov1 (RENAME = (CovP1 = varvarrun CovP2 = covrunres));
SET Asycov;
WHERE Row = 1;
DROP Row CovParm;
RUN;
DATA Asycov2 (RENAME = (CovP2 = varvarres));
SET Asycov;
WHERE Row = 2;
DROP Row CovParm CovP1;
RUN;
DATA Asycovbis;
SET Asycov1;
SET Asycov2;
varvartot = varvarrun + varvarres + 2*covrunres;
RUN;
PROC DELETE LIB = WORK DATA = Asycov1 Asycov2;
RUN;

DATA var;
SET CovParmsbis;
SET Asycovbis (KEEP = varvartot);
RUN;

/* merge (Confidence Intervals given by CI1 and CI2) */

DATA Results;
SET Solutionf (DROP = tValue Probt Alpha RENAME = (Lower = CI1 Upper = CI2));
SET var;
RUN;

/* Calculate the Prediction and Tolerance Intervals */
DATA Results (DROP = varvartot MSrun tPI krun kres Hrun Hres all);
SET Results;

varPI = StdErr ** 2 + vartot;
MSrun = varres + 3*varrun;

/* Calculate the degrees of freedom from the total variance */
dfvartot = 2 * (vartot ** 2 / varvartot);

/* Formula (21) paper - 95% Prediction Interval */
tPI = quantile('T',.975,dfvartot);
PI1 = Estimate - tPI * sqrt(varPI);
PI2 = Estimate + tPI * sqrt(varPI);

/* Formulae (26,27,28) paper - 95%-90% Tolerance Interval */

```

```
krun = 1/3;
kres = 1-1/3;
Hrun = (6-1)/quantile('CHISQUARE',0.1,6-1) - 1;
Hres = 12/quantile('CHISQUARE',0.1,12) - 1;
all = Hrun**2 * krun**2 * MSrun**2 + Hres**2 * kres**2 * varres**2;
TI1 = Estimate - quantile('NORMAL', 0.975) * sqrt(varPI) * sqrt(1+1/vartot*sqrt(all));
TI2 = Estimate + quantile('NORMAL', 0.975) * sqrt(varPI) * sqrt(1+1/vartot*sqrt(all));
RUN;
```

## Assay Validation Study - R Code

```
# Assay Validation Study, data from Hoffman and Kringle (2005)
# Estimate Mixed Model and calculate the different statistical intervals
# Bernard G FRANCO

rm(list = ls())

library(varComp) # Archived R package

run = rep(1:6, each = 3)
rep = rep(1:3, length.out = 18)
y = c(0.969, 0.976, 0.938, 0.952, 0.993, 0.956, 0.989, 0.883, 0.981, 1, 0.969, 0.954, 0.959, 0.989, 1.02,
1.02, 1.09, 1.02)
dat = data.frame(run = run, rep = rep, y = y)
dat$run = as.factor(dat$run)

# Mixed Model

res = varComp(data = dat, fixed = as.formula("y ~1"), random = as.formula("~run"))
summary(res)

# Intercept and its standard error, and 95% Confidence Interval:

estimate = unname(coef(res, what = "fixed"))
stderr.estimate = attr(unclass(fixef(res)), "anova")[1,1]
attr(unclass(fixef(res)), "anova")

# Variance components and their covariance matrix:

var.run = res$varComp
var.res = res$sigma2

cov.matrix = vcov(res, what = "random")

# Total variance and its variance:

var.tot = unname(var.run + var.res)
var.var.tot = sum(cov.matrix)

# Degrees of freedom for prediction:

r = 2var.tot^2/var.var.tot

# 95% Prediction Interval and 95%-90% Tolerance Interval:

PI1 = estimate - qt(0.975, r) * sqrt(stderr.estimate^2 + var.tot)
PI2 = estimate + qt(0.975, r) * sqrt(stderr.estimate^2 + var.tot)

H.run = 5 / qchisq(0.1, 5) - 1
H.res = 12 / qchisq(0.1, 12) - 1
comp.run = H.run^2 * (1/3)^2 * (3*var.run + var.res)^2
```

```
comp.res = H.res^2 * (1-1/3)^2 * var.res^2
term = 1 + 1/var.tot * sqrt(comp.run + comp.res)
```

```
TI1 = estimate - qnorm(0.975) * sqrt(stderr.estimate^2 + var.tot) * sqrt(term)
TI2 = estimate + qnorm(0.975) * sqrt(stderr.estimate^2 + var.tot) * sqrt(term)
```
